# Supplementary material for: A laser-fabricated nanometer-thick carbon film and its strain-engineering for achieving ultrahigh piezoresistive sensitivity
Source: Royal Society of Chemistry journal article supplement (doi:10.1039/c9tc03466h), 2019-01-01
Supplement: c9tc03466h2.pdf [file c9tc03466h2.pdf]

Electronic Supplementary Material (ESI) for Journal of Materials  
Chemistry C.

This journal is © The Royal Society of Chemistry 2019

## Supporting Information

### **Laser Fabricated Nanometer-thick Carbon Film and Its Strain-Engineering for Achieving Ultrahigh Piezoresistive Sensitivity**

*Jiangjiang Luo, Xiaoshuang Duan, Zhepeng Chen, Xiaojun Ruan, Yanbo Yao and Tao Liu\**

College of Chemistry, Chemical Engineering and Materials Science, Soochow

University, Soochow, No. 199 Renai Road, Soochow City, 215123, P.R. China

E-mail: [tliu@suda.edu.cn](mailto:tliu@suda.edu.cn)

### **Experimental Section**

*Preparation of ultrathin carbon film on a fused silica substrate by DLWc and its transfer to a polyimide substrate:* A vacuum spin coater (VTC-200P, Shenyang Branch Crystal Automation Equipment Co., Ltd.) was used for preparing polyamic acid (PAA) thin film on a fused silica with size of 50 mm × 50 mm × 1 mm (SiO<sub>2</sub> ≥99.98%, Lianyungang Xinben Fused quartz Co., Ltd) at room temperature and relative humidity < 50%. Before spinning coating operation, the stock solution of PAA (YE1001, 20 wt. % solid content, Shanghai Wild Wo Industry and Trade Co. Ltd.) was diluted to 1 - 7wt. % by molecular sieve dried N, N-dimethylformamide

(DMF,  $\geq 99.8\%$ , Aladdin - full name) for controlling the film thickness. The fused silica was also surface treated/cleaned by O<sub>2</sub> plasma (ZEPTO, Shanghai Erdi Instrument Technology Co., Ltd.) for 1 minute prior to spin coating. The same spinning condition was applied to prepare all PAA film samples in our study, which included three sequential steps: step 1 – constant spinning speed at 1000 rpm for 30 sec; step 2 – constant spinning speed at 2000 rpm for 30 sec; and step 3 – constant spinning speed at 5000 rpm for 30 sec. Subsequent to spin coating process, the wet PAA films was heat treated at 100 °C for 1h, 150 °C for 1.5 h and 300 °C for 1 h following this order to give polyimide (PI) thin film ready for direct laser writing carbonization (DLWc) process. A laser engraving and cutting machine equipped with a CO<sub>2</sub> laser of wavelength 10.6  $\mu\text{m}$  (SCE4030, Wuhan Sunic Photoelectricity Equipment Manufacture Co., Ltd.) was used to apply DLWc operation on the PI film prepared above. In the DLWc process, a line scanning laser writing mode was adopted with laser power, laser scanning speed and line-to-line interval respectively set at 1.5 W, 10 mm/s and 50  $\mu\text{m}$  to fabricate the square-shaped ultrathin carbon film with size of 3 mm  $\times$  3 mm. To transfer the as-formed ultrathin carbon film on the fused silica to a polymer substrate, e.g., polyimide (PI), we adopted a solution cast and film peeling off process. In brief, a thin layer of PAA solution (20 wt. %) was spun cast onto the fused silica, on which the ultrathin carbon film was formed, by using a two-step spinning condition: step 1 – constant spinning speed at 1000 rpm for 30 sec; and step 2 – constant spinning speed at 2000 rpm for 30 sec. Following the spin coating process, the same heat treatment protocol as described above was applied

to convert PAA into a PI film, which was then peeled off readily with the ultrathin carbon film intimately adhered.

*Electrical and piezoresistive property measurement and strain-engineering of the*

*ultrathin carbon film for enhancing its piezoresistive sensitivity:* The I–V behavior

and the sheet resistance of the ultrathin carbon films being transferred onto a PI film

was measured at room temperature by a Keithley 3706A system switch/multimeter

and a Keithley 2182A nanovoltmeter with current injection applied by a Keithley

6221 current source. For selected film samples, we also tested their temperature-

dependent electrical property with temperature controlled by a liquid nitrogen cooling

accessory system of Q800 dynamic mechanical analyzer (DMA, TA instruments).

During such test, the temperature was ramped from -100 to +100 °C at a rate of 5 °C

/min. By following the procedure disclosed in our previous work,<sup>1-3</sup> we performed

coupled electrical–mechanical test by using the Q800 dynamic mechanical analyzer to

evaluate the piezoresistive behavior of the ultrathin carbon film on a PI substrate at

35 °C. The sample used for this test had a dimension of 25 mm × 6 mm. During the

test, a tensile deformation was applied through force-control mode. The typical testing

protocol was to ramp the force at a rate of 1 N/min to achieve the final strain up to

2 %. In the meantime, the electrical resistance of the ultrathin carbon film was

measured by a Keithley 3706A system switch/multimeter equipped with a 3721 dual 1

× 20 multiplexer card at a sampling rate of 1/s. To enhance the piezoresistive

sensitivity of the ultrathin carbon films, we also designed a strain engineering

procedure to intentionally introduce micro/nano cracks in the ultrathin carbon film.

During the strain engineering process, the ultrathin carbon film on a PI substrate of size  $25\text{ mm} \times 6\text{ mm}$  was stretched at a constant force rate  $1\text{ N/min}$  while its resistance was monitored. The crack formation was signified by an abrupt rise of the resistance at a certain critical strain level. When this sudden resistance increase occurred, the film sample was further stretched to allow the resistance value to reach above  $100\text{ M}\Omega$  to complete the strain engineering process.

*Morphology and structure characterization of the ultrathin carbon films with or without nano cracks:* The morphology of the as-prepared, transferred and strain engineered- ultrathin carbon films were examined by optical microscopy (OM, MP41, Guangzhou Mingmei Optoelectronic Technology Co., Ltd.), scanning electron microscope (SEM, Hitachi SU8010), and atomic force microscopy (AFM, Bruker Dimension Icon). Transmission electron microscopy (Hitachi HT7700 and Tecnai F20) were also performed to observe the order/disorder graphitic structure of the ultrathin carbon films. The TEM sample was prepared by gently scraped off the as-prepared carbon film from the fused silica substrate with a doctor blade and then dispersed in ethanol by sonication. The suspension was then dropped onto a 325-mesh copper grid and dried at room temperature for TEM observation. The chemical structures of the ultrathin carbon films were characterized by attenuated total reflection infrared spectroscopy (Nicolet IS50), backscattering Raman scattering spectroscopy (LabRam HR800 confocal Raman microscopy,  $50\times$  objective,  $514\text{ nm}$  excitation wavelength) and X-ray photoelectron spectroscopy (XPS, ESCALAB 250

XI). The optical and electronic property of the ultrathin carbon film was measured by using UV-Vis-NIR optical absorption spectroscopy (200 – 2000 nm).

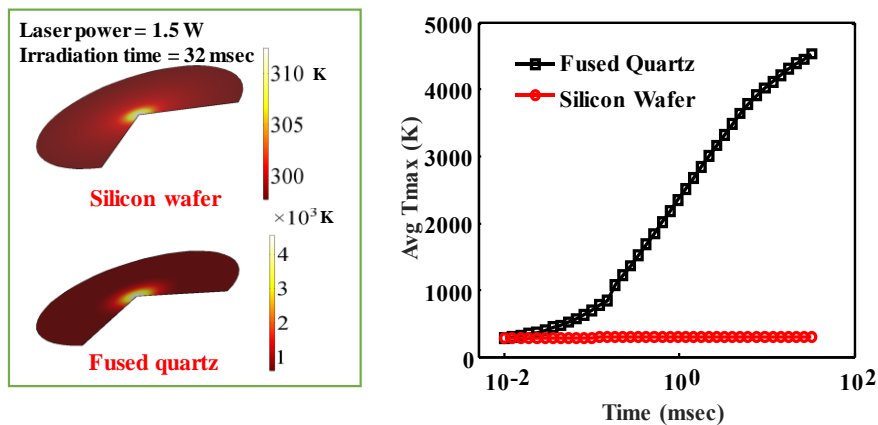

**Fig S1.** Photothermal modeling and simulation results on temperature rise of a thin PI film (1  $\mu$ m) on a fused quartz and a silicon wafer under 1.5 W CO<sub>2</sub> laser irradiation for varied time duration.

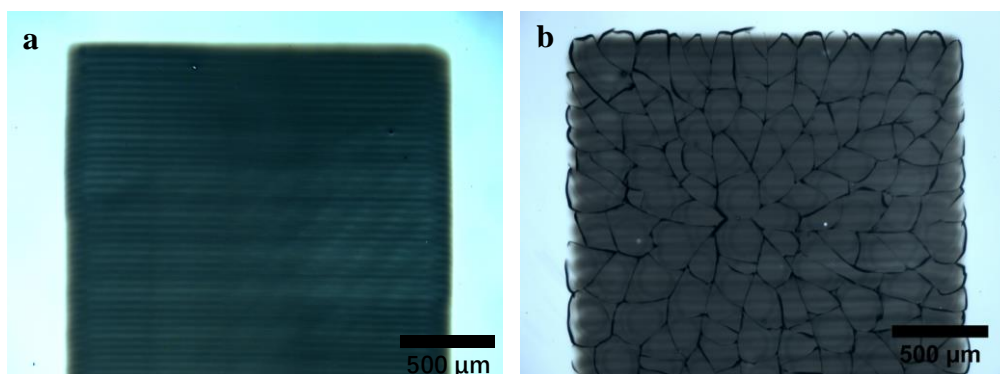

**Fig S2.** Optical images of the ultrathin carbon films fabricated by DLWc on a fused quartz (a) and a microscope glass slide (b). Both films were fabricated with laser power = 1.5 W and at a beam scanning speed = 10 mm/sec.

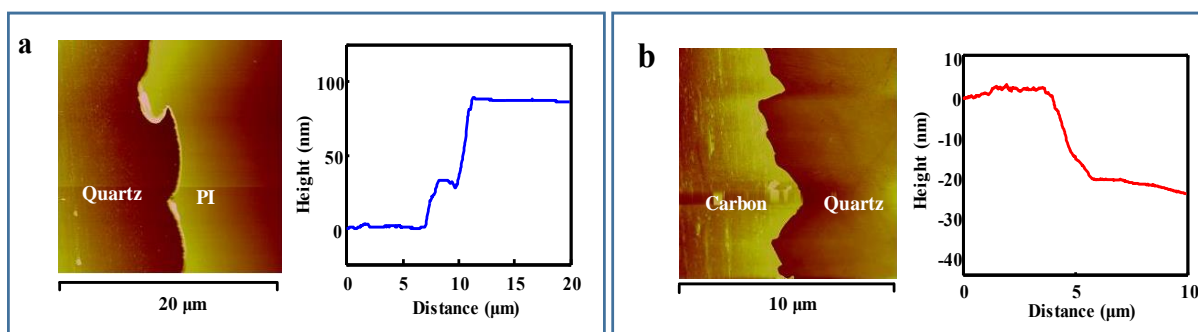

**Fig S3.** AFM height image of a representative PI thin film (a) and ultrathin carbon film (b) prepared from 3wt. % PAA on quartz substrate.

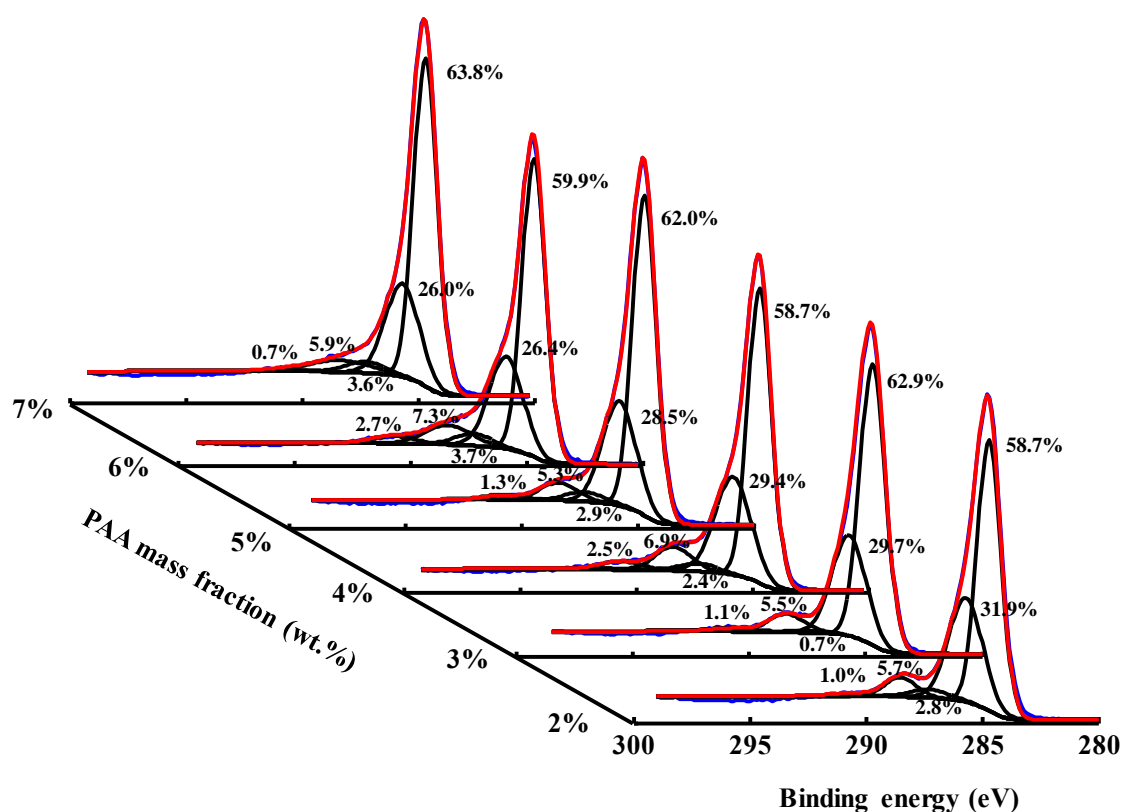

**Fig S4.** Peak-resolved high-resolution XPS  $C_{1s}$  spectra for the ultrathin carbon film samples prepared from 2%-7% wt. PAA solution. The resolved five peaks include graphitic  $sp^2$  carbon at 284.7 eV, carbon with phenolic, alcohol, or C=N functional groups (285.5 -285.7 eV), carbonyl or quinone groups (287.4 -287.7 eV), carboxyl or ester groups (288.0-288.6 eV) and satellite peak due to  $\pi-\pi^*$  transition in an aromatic system (289.6-290.0 eV).

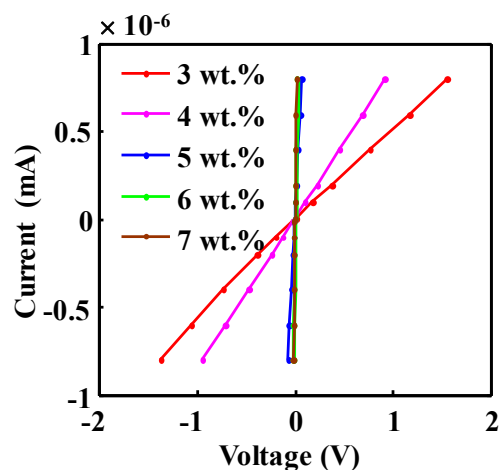

**Fig S5.** I-V behavior of the ultrathin carbon films prepared from 3 - 7 wt. % PAA solution.

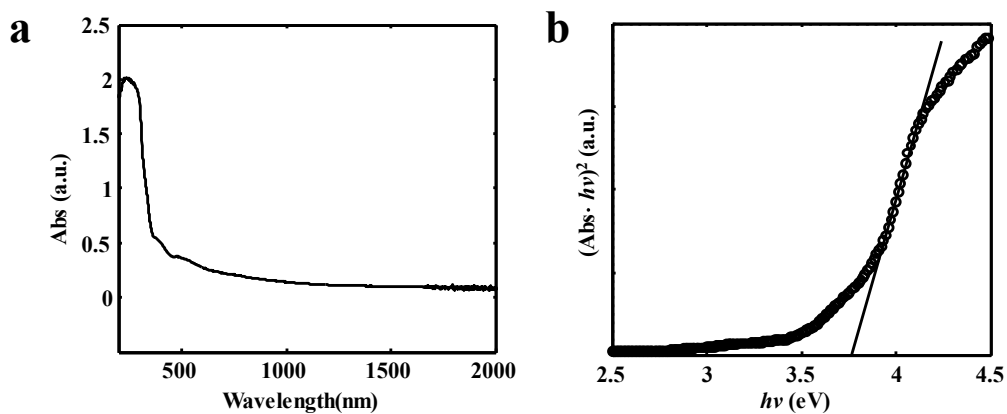

**Fig S6.** (a) UV-Vis absorbance spectrum of an ultrathin carbon film prepared from 7 wt. % PAA solution; (b) Tauc plot of the result shown in (a) for estimating the band-gap energy of the ultrathin carbon film, which is about 3.75 eV.

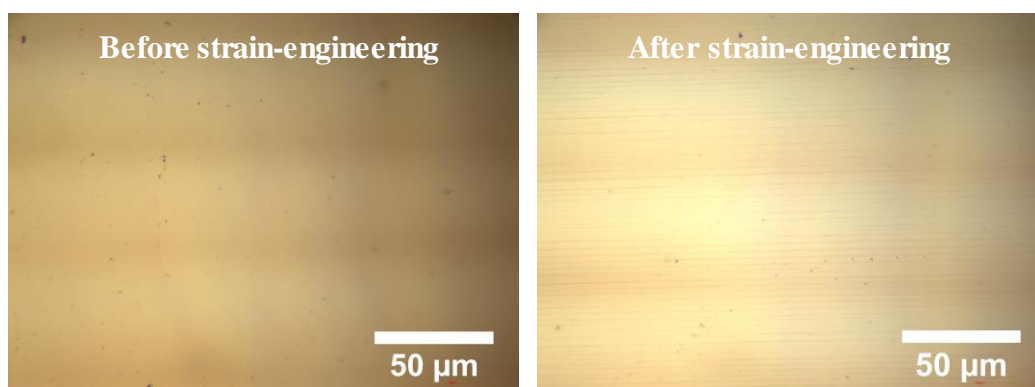

**Fig S7.** Optical micrographs of the ultrathin carbon film prepared from 5 wt. % PAA solution before (left) and after (right) strain-engineering treatment. The straight-line features appeared in the strain-engineering sample but free from the pristine sample extend across the entire width of the sample.

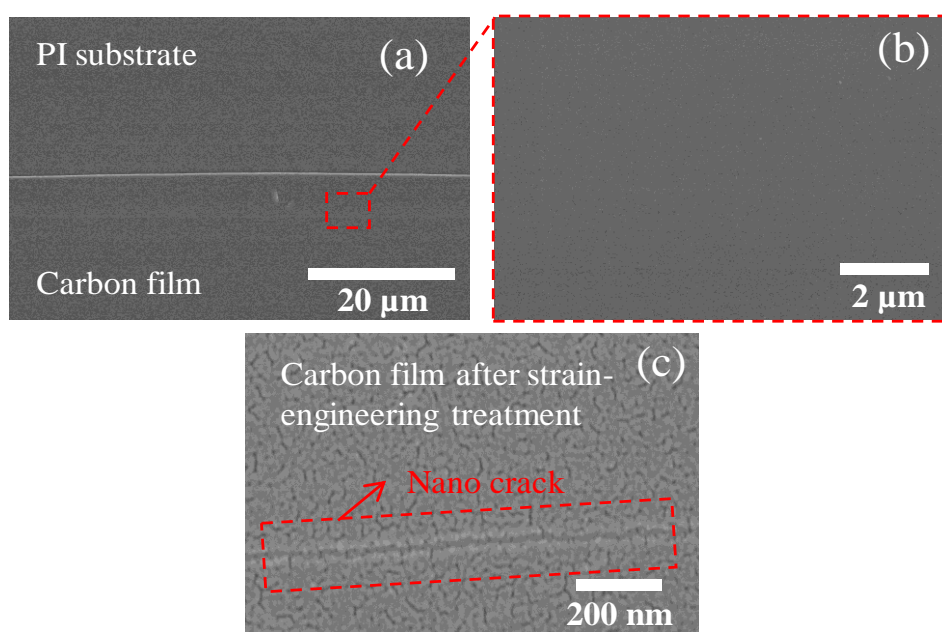

**Fig S8.** SEM imaging to reveal (a, b) the smooth surface morphology of the as-prepared ultrathin carbon film being transferred to a PI substrate; (c) Nanocrack formation upon strain-engineering treatment. The short and curved crack features in (c) are due to artifacts introduced by gold coating in SEM sample preparation.

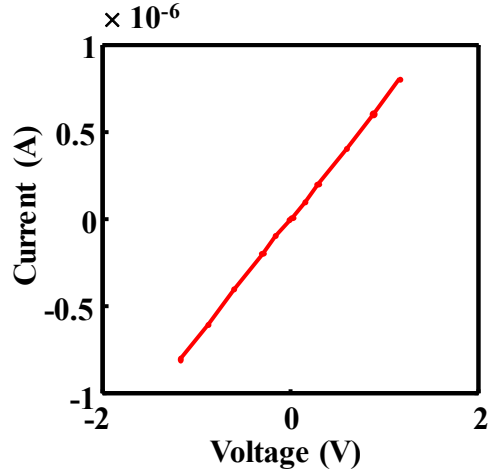

**Fig S9.** I-V behavior of an ultrathin carbon film with thickness of 52 nm prepared from 4 wt. % PAA after strain-engineering treatment.

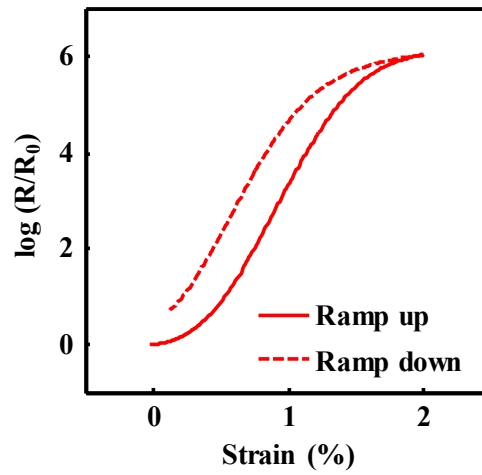

**Fig S10.** Hysteresis of the piezoresistive behavior of the strain-engineered ultrathin carbon film with thickness of 52 nm prepared from 4 wt. % PAA solution.

**Table S1.** Summary of the strain-to-failure and GF results for all ultrathin carbon film samples being studied in this work

| PAA Conc. (wt. %) | Sample ID | Film Thickness (nm) | Before Strain-Engineering Treatment |              |                              | After Strain-Engineering Treatment |                              |
|-------------------|-----------|---------------------|-------------------------------------|--------------|------------------------------|------------------------------------|------------------------------|
|                   |           |                     | Strain-to-failure (%)               | Gauge Factor | Strain for GF evaluation (%) | Gauge Factor                       | Strain for GF evaluation (%) |

|   |   |     |            |      |                          |         |      |
|---|---|-----|------------|------|--------------------------|---------|------|
| 7 | 1 | 180 | 1.85       | 1.46 | $0 < \varepsilon < 1.84$ | 322,931 | 1.32 |
|   | 2 |     | 2.51       | 2.42 | $0 < \varepsilon < 2.49$ | 3,142   | 1.16 |
|   | 3 |     | 3.13       | 2.66 | $0 < \varepsilon < 1.67$ | 454,832 | 1.46 |
|   | 4 |     | 1.90       | 1.17 | $0 < \varepsilon < 1.86$ | 154,752 | 1.84 |
|   | 5 |     | 2.33       | 1.07 | $0 < \varepsilon < 2.32$ | 39,293  | 1.92 |
|   | 6 |     | 2.84       | 1.28 | $0 < \varepsilon < 2.82$ | 74,268  | 1.74 |
|   | 7 |     | Not Tested |      |                          | 10,135  | 1.04 |
|   | 8 |     |            |      |                          | 86,547  | 1.88 |
| 6 | 1 | 94  | 1.94       | 1.50 | $0 < \varepsilon < 1.93$ | 129,535 | 1.33 |
|   | 2 |     | 1.85       | 1.36 | $0 < \varepsilon < 1.83$ | 63,741  | 2.86 |
|   | 3 |     | Not Tested |      |                          | 296,034 | 2.14 |
|   | 4 |     |            |      |                          | 479,358 | 1.81 |
|   | 5 |     |            |      |                          | 3,124   | 1.16 |
| 5 | 1 | 59  | 1.46       | 1.45 | $0 < \varepsilon < 1.45$ | 2,271   | 3.45 |
|   | 2 |     | 1.99       | 1.65 | $0 < \varepsilon < 1.98$ | 49,773  | 1.50 |
| 4 | 1 | 52  | 1.74       | 1.23 | $0 < \varepsilon < 1.72$ | 21,150  | 2.00 |
|   | 2 |     | 2.35       | 1.72 | $0 < \varepsilon < 2.33$ | 204     | 1.05 |
| 3 | 1 | 22  | 2.88       | 1.63 | $0 < \varepsilon < 2.86$ | 45      | 0.94 |

**Table S2.** Summary of gauge factor (GF) and the corresponding strains used for GF evaluation at small deformation (strain <5%) repored in the literature

| Active Sensing Element                    | Substrate           | Fabrication Method   | Gauge factor | Strain for GF evaluation (%) | Durability (Strain/Cycle s) | Ref./ Published year |
|-------------------------------------------|---------------------|----------------------|--------------|------------------------------|-----------------------------|----------------------|
| Strain – engineered ultrathin carbon film | PI                  | Direct laser writing | 100-30000    | $0 < \varepsilon < 1\%$      | 1% / >1000                  | This work/2019       |
|                                           |                     |                      | 30000-470000 | $1\% < \varepsilon < 2\%$    |                             |                      |
| SiC                                       | Elastomer           | Direct laser writing | 854          | $0 < \varepsilon < 3.5\%$    | 4% /10000                   | [4]/2018             |
|                                           |                     |                      | 122060       | $3.5\% < \varepsilon < 5\%$  |                             |                      |
| Cracked Pt                                | PUA/PET             | Depositing           | 2282         | $\varepsilon=2\%$            | 2%/1000000                  | [5]/2018             |
| Au nanoparticles                          | PDMS                | Sputter-coating      | 945          | $0 < \varepsilon < 1.5\%$    | $\pm 0.7\%/50$              | [6]/2018             |
|                                           |                     |                      | 5888         | $1.5\% < \varepsilon < 2\%$  |                             |                      |
| Au nanoparticles                          | PDMS film and fiber | Evaporation          | <2           | $\varepsilon < 5\%$          | 50% / 5000                  | [7]/2018             |

|                                               |                              |                                 |            |                               |             |           |
|-----------------------------------------------|------------------------------|---------------------------------|------------|-------------------------------|-------------|-----------|
| MWCNT/RGO@PU sponge                           | PU sponge                    | Dip-coating                     | <1         | $0 < \varepsilon < 5\%$       | Not tested  | [8]/2018  |
| SWNT network                                  | Pre-stretched PDMS thin film | Dropping                        | $10^3$     | $0 < \varepsilon < 2\%$       | 5% / 2300   | [9]/2018  |
| Porous carbon                                 | PI                           | Direct laser writing            | 5000-10000 | $\varepsilon < 0.1\%$         | Not tested  | [1]/2017  |
| Cracked Au, Ag and Pt layered film;           | PET                          | Thermal evaporation             | 1600       | $\varepsilon=2\%$             | 2% / 5000   | [10]/2017 |
| Channel Crack-Designed Gold@PU Sponge         | PU sponge                    | Ion sputtering                  | 1          | $\varepsilon<5\%$             | 45% /1000   | [11]/2017 |
| Graphite thin films with parallel microcracks | Ecoflex® elastomer film      | Bar coating                     | <80        | $0 < \varepsilon < 5\%$       | Not tested  | [12]/2016 |
| Channel crack based gold film                 | PDMS                         | Electron beam evaporation       | 1000       | $0.5\% < \varepsilon < 0.7\%$ | 0.5% /1000  | [13]/2016 |
|                                               |                              |                                 | 5000       | $0.7\% < \varepsilon < 1\%$   |             |           |
| Gold film                                     | Microstructured PDMS         | Depositing                      | < 5        | 5%                            | Not tested  | [14]/2015 |
| Thickness-Gradient Film                       | PDMS                         | Dropping                        | 100        | $0 < \varepsilon < 2\%$       | 2% / 100000 | [15]/2015 |
| Nano graphene film                            | PDMS                         | CVD and transferring            | 600        | $\varepsilon < 1\%$           | 0.3% /10000 | [16]/2015 |
| Monolayer Au nanoparticle                     | PET                          | Chemical synthesis              | 300        | $\varepsilon < 0.3\%$         | Not tested  | [17]/2015 |
| Ion-based Ag nano-ink                         | PDMS stamp                   | Spin-coating                    | 0.06       | $\varepsilon=5\%$             | 10% /1000   | [18]/2014 |
| Graphene rubber composites                    | Rubber band                  | Liquid exfoliation And infusion | 20         | $\varepsilon < 5\%$           | 75% /1000   | [19]/2014 |
| Cracked Pt layer                              | PUA                          | Sputtering                      | >2000      | $0 < \varepsilon < 2\%$       | 2% /5000    | [20]/2014 |

|                                      |                   |                                           |                  |                           |              |           |
|--------------------------------------|-------------------|-------------------------------------------|------------------|---------------------------|--------------|-----------|
| Cracked thin gold film               | PU foam           | Evaporation                               | <200             | $0 < \varepsilon < 5\%$   | 20% /1000    | [21]/2013 |
| Graphene woven fabrics               | Prestretched PDMS | CVD                                       | $10^0 \sim 10^3$ | $0 < \varepsilon < 5\%$   | Not tested   | [22]/2012 |
| Micro channel liquid metal           | Silicone rubber   | Injecting                                 | 3                | $\varepsilon < 5\%$       | Not tested   | [23]/2012 |
| Graphene film                        | None substrate    | Mechanically exploited                    | 150              | $0 < \varepsilon < 3\%$   | Not tested   | [24]/2011 |
| Aligned CNT thin film                | PDMS              | CVD                                       | 60               | $\varepsilon < 5\%$       | 150% /10000  | [25]/2011 |
| Cross-stacked super aligned CNT film | PDMS              | Pouring                                   | 0.4              | $\varepsilon < 5\%$       | 15% /200     | [26]/2011 |
| Zno/PS nanowire                      | PDMS              | Electrospinning and hydrothermal reaction | 116              | $\varepsilon < 5\%$       | 4% /120      | [27]/2011 |
| BEDT-TTF composite bilayer film      | PC                | -                                         | 1800             | $0 < \varepsilon < 0.5\%$ | 0.5% / > 270 | [28]/2010 |

## Reference

1. X. Duan, J. Luo, Y. Yao and T. Liu, *ACS Appl. Mater. Interfaces*, 2017, **9**, 43133-43142.
2. J. Luo, Y. Yao, X. Duan and T. Liu, *J. Mater. Chem. C*, 2018, **6**, 4727-2736.
3. S. Luo, P. T. Hoang and T. Liu, *Carbon*, 2016, **96**, 522-531.
4. Q. Li, Y. Gao, R. Wu, J. Sha, Y. Lu, and F. Xuan, *Adv. Funct. Mater*, 2018, 1806786.
5. B. Park, S. Lee, H. Choi, J. U. Kim, H. Hong, C. Jeong, D. Kang and T. I. Kim, *Nanoscale*, 2018, **10**, 4354-4360.
6. Z. Han, L. Liu, J. Zhang, Q. Han, K. Wang, H. Song, Z. Wang, Z. Jiao, S. Niu and L. Ren, *Nanoscale*, 2018, **10**, 15178-15186.
7. B. Zhang, J. Lei, D. Qi, Z. Liu, Y. Wang, G. Xiao, J. Wu, W. Zhang, F. Huo and X. Chen, *Adv. Funct. Mater*, 2018, **28**, 1801683.
8. Z. Ma, A. Wei, J. Ma, L. Shao, H. Jiang, D. Dong, Z. Ji, Q. Wang and S. Kang, *Nanoscale*, 2018, **10**, 7116-7126.
9. Y. Jiang, Z. Y. Liu, N. Matsuhisa, D. P. Qi, W. R. Leow, H. Yang, J. C. Yu, G. Chen, Y. Q. Liu, C. J. Wan, Z. J. Liu and X. D. Chen, *Adv. Mater*, 2018, **30**, 8.
10. T. Lee, Y. W. Choi, G. Lee, S. M. Kim, D. Kang and M. Choi, *Rsc. Adv*, 2017, **7**, 34810-34815.
11. Y. H. Wu, H. Z. Liu, S. Chen, X. C. Dong, P. P. Wang, S. Q. Liu, Y. Lin, Y. Wei and L. Liu, *ACS Appl. Mater. Interfaces*, 2017, **9**, 20098-20105.
12. M. Amjadi, M. Turan, C. P. Clementson and M. Sitti, *ACS Appl. Mater. Interfaces*, 2016, **8**, 5618-5626.
13. T. Yang, X. Li, X. Jiang, S. Lin, J. Lao, J. Shi, Z. Zhen, Z. Li and H. Zhu, *Mater. Horiz*, 2016, **3**, 248-255.
14. H. L. Filiatrault, R. S. Carmichael, R. A. Boutette and T. B. Carmichael, *ACS Appl. Mater. Interfaces*, 2015, **7**, 20745-20752.
15. Z. Liu, D. Qi, P. Guo, Y. Liu, B. Zhu, H. Yang, Y. Liu, B. Li, C. Zhang and J. Yu, *Adv. Mater*, 2015, **27**, 6230.
16. J. Zhao, G. Wang, R. Yang, X. Lu, M. Cheng, C. He, G. Xie, J. Meng, D. Shi and G. Zhang, *ACS nano*, 2015, **9**, 1622-1629.
17. L. Yi, W. Jiao, K. Wu, L. Qian, X. Yu, Q. Xia, K. Mao, S. Yuan, S. Wang and Y. Jiang, *Nano. Res*, 2015, **8**, 2978-2987.
18. J. Lee, S. Kim, J. Lee, D. Yang, B. C. Park, S. Ryu and I. Park, *Nanoscale*, 2014, **6**, 11932-11939.
19. U. K. Conor, S. Boland, C. Backes, A. O'Neill, J. McCauley, S. Duane, R. Shanker, Y. Liu, I. Jurewicz, A. B. Dalton and J. N. Coleman, *ACS nano*, 2014, **8**, 8819.
20. D. Kang, P. V. Pikhitsa, Y. W. Choi, C. Lee, S. S. Shin, L. Piao, B. Park, K.-Y. Suh, T. I. Kim and M. Choi, *Nature*, 2014, **516**, 222.
21. H. Vandepparre, Q. Liu, I. R. Mineev, Z. Suo and S. P. Lacour, *Adv Mater*, 2013, **25**, 3117-3121.

22. X. Li, R. J. Zhang, W. J. Yu, K. L. Wang, J. Q. Wei, D. H. Wu, A. Y. Cao, Z. H. Li, Y. Cheng, Q. S. Zheng, R. S. Ruoff and H. W. Zhu, *Scientific Reports*, 2012, **2**, 6.
23. P. Yong-Lae, C. Bor-Rong and R. J. Wood, *IEEE Sens. J.*, 2012, **12**, 2711-2718.
24. M. Huang, T. A. Pascal, H. Kim, W. A. Goddard and J. R. Greer, *Nano Lett.*, 2011, **11**, 1241-1246.
25. T. Yamada, Y. Hayamizu, Y. Yamamoto, Y. Yomogida, A. Izadi-Najafabadi, D. N. Futaba and K. Hata, *Nat Nanotechnol*, 2011, **6**, 296-301.
26. K. Liu, Y. Sun, P. Liu, X. Lin, S. Fan and K. Jiang, *Advanced Functional Materials*, 2011, **21**, 2721-2728.
27. X. Xiao, L. Yuan, J. Zhong, T. Ding, Y. Liu, Z. Cai, Y. Rong, H. Han, J. Zhou and Z. L. Wang, *Adv Mater*, 2011, **23**, 5440-5444.
28. E. Laukhina, R. Pfattner, L. R. Ferreras, S. Galli, M. Mas-Torrent, N. Masciocchi, V. Laukhin, C. Rovira and J. Veciana, *Adv. Mater*, 2010, **22**, 977.
